# Supplementary material for: Silica sacrificial layer-assisted in-plane incorporation of Au nanoparticles into mesoporous titania thin films through different reduction methods
Source: Royal Society of Chemistry journal article supplement (doi:10.1039/c3dt50236h), 2013-01-01
Supplement: c3dt50236h.pdf [file c3dt50236h.pdf]

## **Electronic Supporting Information**

# **Silica Sacrificial Layer-Assisted In-Plane Incorporation of Au Nanoparticles into Mesoporous Titania Thin Films through Different Reduction Methods**

Chih-Peng Liang, Yusuke Yamauchi, and Kevin C.-W. Wu\*

*Department of Chemical Engineering, National Taiwan University, No. 1, Sec. 4,*

*Roosevelt Road, Taipei 10617, Taiwan*

\*Corresponding Author's E-mail: [kevinwu@ntu.edu.tw](mailto:kevinwu@ntu.edu.tw)

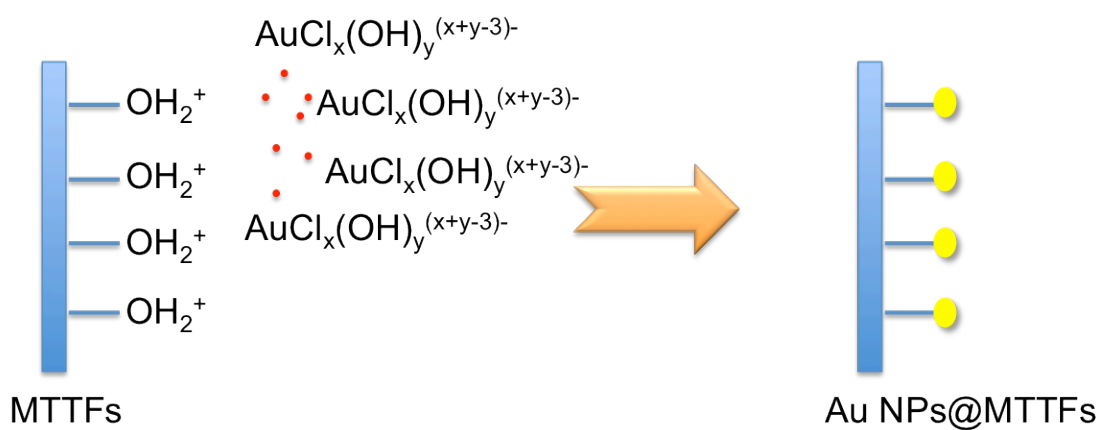

**Scheme 1.** Illustration showing the formation mechanism of Au NPs on the surface of mesoporous titania thin films.
